# Supplementary material
Source: Springer Nature journal article supplement (https://www.springermedizin.de/resource/supplementary/13058_2011_2734_MOESM4_ESM.pdf/9702452)

**A.**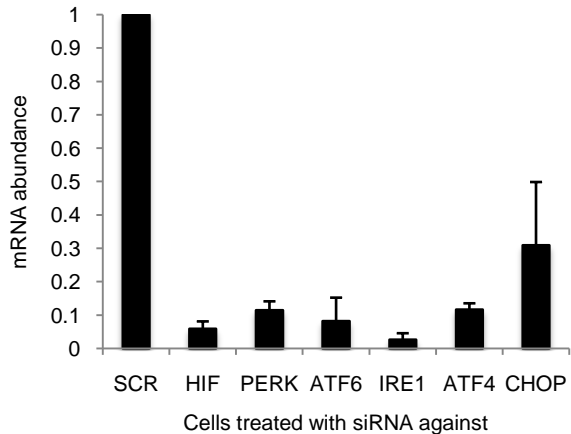**B.**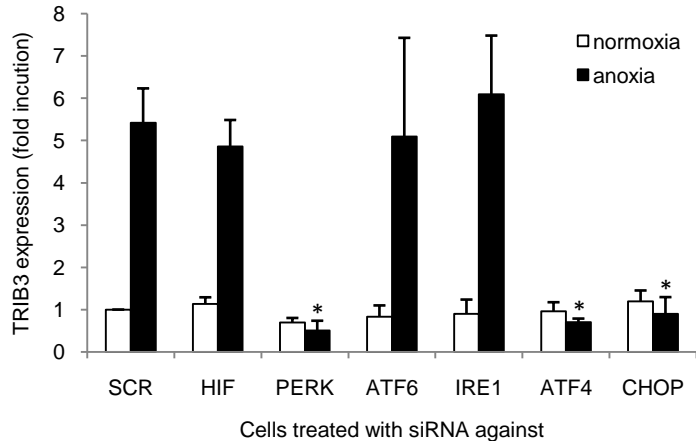

Supplement: MOESM4 [file 9702452]
